# Supplementary material for: Control of oxygen vacancies in ZnO nanorods by annealing and their influence on ZnO/PEDOT:PSS diode behaviour
Source: Royal Society of Chemistry journal article supplement (doi:10.1039/c7tc04284a), 2018-01-01
Supplement: c7tc04284a1.pdf [file c7tc04284a1.pdf]

## Supplementary Information

### Control of oxygen vacancies in ZnO nanorods by annealing and their influence on ZnO/PEDOT:PSS diode behaviour

Ying Tu<sup>a</sup>, Shuqun Chen<sup>b</sup>, Xuan Li<sup>a</sup>, Jelena Gorbaciova<sup>c</sup>, William P. Gillin<sup>c</sup>, Steffi Krause<sup>a</sup>, and Joe Briscoe<sup>a\*</sup>

- a. Materials Research Institute and School of Engineering and Materials Science, Queen Mary University of London, Mile End Road, London, E1 4NS, UK. E-mail:j.briscoe@qmul.ac.uk
- b. Key Laboratory of Advanced Functional Materials, School of Materials and Engineering, Beijing University of Technology, Beijing, 100124, China
- c. Materials Research Institute and School of Physics and Astronomy, Queen Mary University of London, Mile End Road, London, E1 4NS, UK

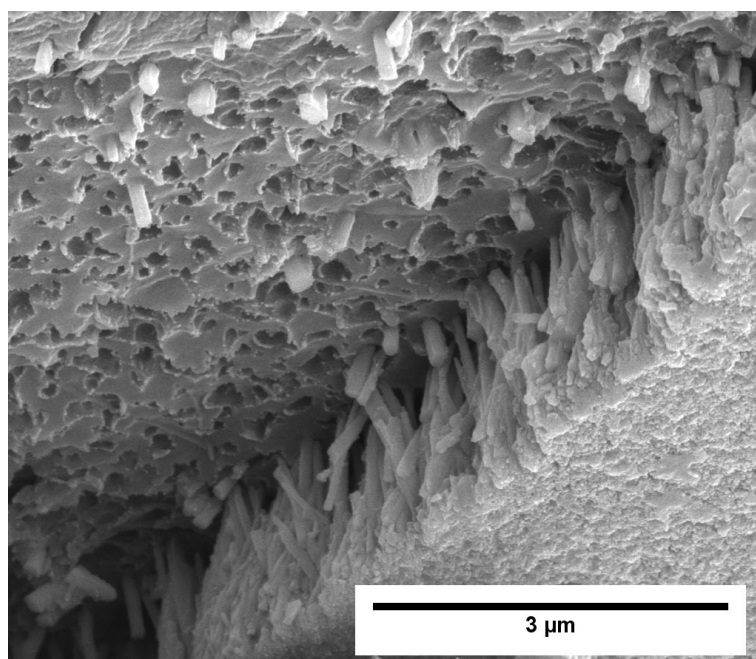

*Figure S1 SEM image of the ZnO/PEDOT:PSS interface with ZnO partially removed. The holes in the PEDOT:PSS layer originated from the tips of the ZnO nanorods which penetrated inside the layer.*
